# Supplementary material for: Metazoan evolution of glutamate receptors reveals unreported phylogenetic groups and divergent lineage-specific events
Source: PubMed Central journal article supplement (PMC6307864; doi:10.7554/elife.35774), 2018-11-22
Supplement: elife-35774-fig1-data4.pdf [file elife-35774-fig1-data4.pdf]

**Figure 1 – figure supplement 6. Summary of MolProbity results.**

|                         |                               |            |        |                                                     |
|-------------------------|-------------------------------|------------|--------|-----------------------------------------------------|
| All-Atom Contacts       | Clashscore*, all atoms:       | 83.89      |        | 16 <sup>th</sup> percentile* (N=37, 3Å - 9999Å)     |
| Protein Geometry        | Poor rotamers                 | 28         | 3.73%  | Goal: <0.3%                                         |
|                         | Favored rotamers              | 674        | 89.87% | Goal: >98%                                          |
|                         | Ramachandran outliers         | 13         | 1.43%  | Goal: <0.05%                                        |
|                         | Ramachandran favored          | 837        | 92.18% | Goal: >98%                                          |
|                         | MolProbity score <sup>^</sup> | 3.31       |        | 79 <sup>th</sup> percentile* (N=342, 3.25Å - 3.85Å) |
|                         | C $\beta$ deviations > 0.25Å  | 5          | 0.60%  | Goal: 0                                             |
|                         | Bad bonds:                    | 2 / 7190   | 0.03%  | Goal: 0%                                            |
|                         | Bad angles:                   | 154 / 9785 | 1.57%  | Goal: <0.1%                                         |
| Peptide Omegas          | Cis Prolines:                 | 1 / 35     | 2.86%  | Expected: $\leq 1$ per chain, or $\leq 5\%$         |
|                         | Cis nonProlines:              | 2 / 874    | 0.23%  | Goal: <0.05%                                        |
|                         | Twisted Peptides:             | 1 / 909    | 0.11%  | Goal: 0                                             |
| Low-resolution Criteria | CaBLAM outliers               | 27         | 2.98%  | Goal: <1.0%                                         |
|                         | CA Geometry outliers          | 18         | 1.98%  | Goal: <0.5%                                         |

|                         |                               |            |        |                                                     |
|-------------------------|-------------------------------|------------|--------|-----------------------------------------------------|
| All-Atom Contacts       | Clashscore*, all atoms:       | 65.68      |        | 24 <sup>th</sup> percentile* (N=37, 3Å - 9999Å)     |
| Protein Geometry        | Poor rotamers                 | 7          | 0.93%  | Goal: <0.3%                                         |
|                         | Favored rotamers              | 737        | 98.27% | Goal: >98%                                          |
|                         | Ramachandran outliers         | 7          | 0.77%  | Goal: <0.05%                                        |
|                         | Ramachandran favored          | 858        | 94.49% | Goal: >98%                                          |
|                         | MolProbity score <sup>^</sup> | 2.66       |        | 96 <sup>th</sup> percentile* (N=342, 3.25Å - 3.85Å) |
|                         | C $\beta$ deviations > 0.25Å  | 0          | 0.00%  | Goal: 0                                             |
|                         | Bad bonds:                    | 296 / 7188 | 4.12%  | Goal: 0%                                            |
|                         | Bad angles:                   | 217 / 9781 | 2.22%  | Goal: <0.1%                                         |
| Peptide Omegas          | Cis Prolines:                 | 0 / 35     | 0.00%  | Expected: $\leq 1$ per chain, or $\leq 5\%$         |
|                         | Twisted Peptides:             | 19 / 909   | 2.09%  | Goal: 0                                             |
| Low-resolution Criteria | CaBLAM outliers               | 38         | 4.19%  | Goal: <1.0%                                         |
|                         | CA Geometry outliers          | 20         | 2.21%  | Goal: <0.5%                                         |

Summary of MolProbity results for the 3D model of full-length GluE1\_Bla. The model comprises residues Met1 to Lys910 and was generated by RaptorX using PDB entry 3kg2 as template

(automatically selected), and further refined with ModRefiner. The tables presented indicate model quality before and after refinement, respectively. Note the improvement of the model upon refinement, as indicated by the clashscore, Ramachandran, and overall MolProbity values.

\*Clashscore is the number of serious steric overlaps ( $> 0.4 \text{ \AA}$ ) per 1000 atoms. 100<sup>th</sup> percentile is the best among structures of comparable resolution; 0<sup>th</sup> percentile is the worst. For clashscore the comparative set of structures was selected in 2004, for MolProbity score in 2006.

^MolProbity score combines the clashscore, rotamer, and Ramachandran evaluations into a single score, normalized to be on the same scale as X-ray resolution.

|                         |                               |             |        |                                                     |
|-------------------------|-------------------------------|-------------|--------|-----------------------------------------------------|
| All-Atom Contacts       | Clashscore*, all atoms:       | 103.39      |        | 10 <sup>th</sup> percentile* (N=37, 3Å - 9999Å)     |
| Protein Geometry        | Poor rotamers                 | 34          | 3.80%  | Goal: <0.3%                                         |
|                         | Favored rotamers              | 779         | 87.04% | Goal: >98%                                          |
|                         | Ramachandran outliers         | 25          | 2.41%  | Goal: <0.05%                                        |
|                         | Ramachandran favored          | 947         | 91.41% | Goal: >98%                                          |
|                         | MolProbity score <sup>^</sup> | 3.43        |        | 73 <sup>rd</sup> percentile* (N=342, 3.25Å - 3.85Å) |
|                         | Cβ deviations >0.25Å          | 16          | 1.66%  | Goal: 0                                             |
|                         | Bad bonds:                    | 2 / 8392    | 0.02%  | Goal: 0%                                            |
|                         | Bad angles:                   | 206 / 11361 | 1.81%  | Goal: <0.1%                                         |
| Peptide Omegas          | Cis Prolines:                 | 1 / 43      | 2.33%  | Expected: ≤1 per chain, or ≤5%                      |
|                         | Cis nonProlines:              | 1 / 994     | 0.10%  | Goal: <0.05%                                        |
|                         | Twisted Peptides:             | 2 / 1037    | 0.19%  | Goal: 0                                             |
| Low-resolution Criteria | Dablam outliers               | 54          | 5.22%  | Goal: <1.0%                                         |
|                         | CA Geometry outliers          | 20          | 1.93%  | Goal: <0.5%                                         |

|                         |                               |             |        |                                                     |
|-------------------------|-------------------------------|-------------|--------|-----------------------------------------------------|
| All-Atom Contacts       | Clashscore*, all atoms:       | 54.48       |        | 45 <sup>th</sup> percentile* (N=37, 3Å - 9999Å)     |
| Protein Geometry        | Poor rotamers                 | 6           | 0.67%  | Goal: <0.3%                                         |
|                         | Favored rotamers              | 872         | 97.43% | Goal: >98%                                          |
|                         | Ramachandran outliers         | 18          | 1.74%  | Goal: <0.05%                                        |
|                         | Ramachandran favored          | 960         | 92.66% | Goal: >98%                                          |
|                         | MolProbity score <sup>^</sup> | 2.67        |        | 96 <sup>th</sup> percentile* (N=342, 3.25Å - 3.85Å) |
|                         | Cβ deviations >0.25Å          | 0           | 0.00%  | Goal: 0                                             |
|                         | Bad bonds:                    | 331 / 8391  | 3.94%  | Goal: 0%                                            |
|                         | Bad angles:                   | 223 / 11359 | 1.96%  | Goal: <0.1%                                         |
| Peptide Omegas          | Cis Prolines:                 | 0 / 43      | 0.00%  | Expected: ≤1 per chain, or ≤5%                      |
|                         | Twisted Peptides:             | 17 / 1037   | 1.64%  | Goal: 0                                             |
| Low-resolution Criteria | CaBLAM outliers               | 40          | 3.86%  | Goal: <1.0%                                         |
|                         | CA Geometry outliers          | 28          | 2.71%  | Goal: <0.5%                                         |

Summary of MolProbity results for the 3D model of full-length GluE7\_Bbe. The model was generated by RaptorX using PDB entries 4u4g (chain A) and 3o4x:E as automatically selected templates for residues Met1–Val948 and Asp949–Val1038, respectively (*P*-values: 4.69e-17 and

9.39e-02, respectively), and further refined with ModRefiner. The tables presented above indicate model quality before and after refinement, respectively. Note the improvement of the model upon refinement, as indicated by the clashscore, Ramachandran, and overall MolProbity values.

\*Clashscore is the number of serious steric overlaps ( $> 0.4 \text{ \AA}$ ) per 1000 atoms. 100<sup>th</sup> percentile is the best among structures of comparable resolution; 0<sup>th</sup> percentile is the worst. For clashscore the comparative set of structures was selected in 2004, for MolProbity score in 2006.

^MolProbity score combines the clashscore, rotamer, and Ramachandran evaluations into a single score, normalized to be on the same scale as X-ray resolution.

|                   |                               |           |        |                                                        |
|-------------------|-------------------------------|-----------|--------|--------------------------------------------------------|
| All-Atom Contacts | Clashscore, all atoms:        | 7.17      |        | 86 <sup>th</sup> percentile* (N=1784, all resolutions) |
| Protein Geometry  | Poor rotamers                 | 1         | 0.44%  | Goal: <0.3%                                            |
|                   | Favored rotamers              | 224       | 97.82% | Goal: >98%                                             |
|                   | Ramachandran outliers         | 3         | 1.16%  | Goal: <0.05%                                           |
|                   | Ramachandran favored          | 246       | 94.98% | Goal: >98%                                             |
|                   | MolProbity score <sup>#</sup> | 1.74      |        | 88 <sup>th</sup> percentile* (N=27675, 0Å - 99Å)       |
|                   | Cβ deviations >0.25Å          | 4         | 1.65%  | Goal: 0                                                |
|                   | Bad bonds:                    | 2 / 2168  | 0.09%  | Goal: 0%                                               |
|                   | Bad angles:                   | 37 / 2918 | 1.27%  | Goal: <0.1%                                            |
| Peptide Omegas    | Cis Prolines:                 | 2 / 8     | 25.00% | Expected: ≤1 per chain, or ≤5%                         |
|                   | Cis nonProlines:              | 1 / 252   | 0.40%  | Goal: <0.05%                                           |

Summary of MolProbity results for the 3D model of glycine-bound ligand-binding domain of GluE1\_Bba. The model was generated by SWISS-MODEL based on the best available template, the atomic-resolution structure of rat GluA2 with bound glutamate (PDB 4yu0; refined at 1.26 Å resolution). At the light of the model quality, no further refinement was performed.

\*Clashscore is the number of serious steric overlaps (> 0.4 Å) per 1000 atoms. 100<sup>th</sup> percentile is the best among structures of comparable resolution; 0<sup>th</sup> percentile is the worst. For clashscore the comparative set of structures was selected in 2004, for MolProbity score in 2006.

<sup>#</sup>MolProbity score combines the clashscore, rotamer, and Ramachandran evaluations into a single score, normalized to be on the same scale as X-ray resolution.
